# Supplementary material
Source: PubMed Central journal article supplement (PMC3408610)

## **Supporting Information**

### **Structure Activity Relationship of Uridine 5'-Diphosphoglucose (UDP-Glucose)**

#### **Analogues as Agonists of the Human P2Y<sub>14</sub> Receptor**

Hyojin Ko, Ingrid Fricks, Andrei Ivanov,

T. Kendall Harden, Kenneth A. Jacobson

#### **Contents:**

**Figures showing the orientation of the docked compound 15 with respect to the entire receptor structure (Fig. 1) and the character of the side chains lining the putative binding pocket (Fig. 2). The receptor colors in Fig. 1 indicate: N-terminus in red, TM1 in orange, TM2 in ochre, TM3 in yellow, TM4 in green, TM5 in cyan, TM6 in blue, TM7 and C-carboxyl terminus in purple. The colors in Fig. 2 indicate: yellow, neutral; blue, positively charged; red, negatively charged.**

Figure 1.

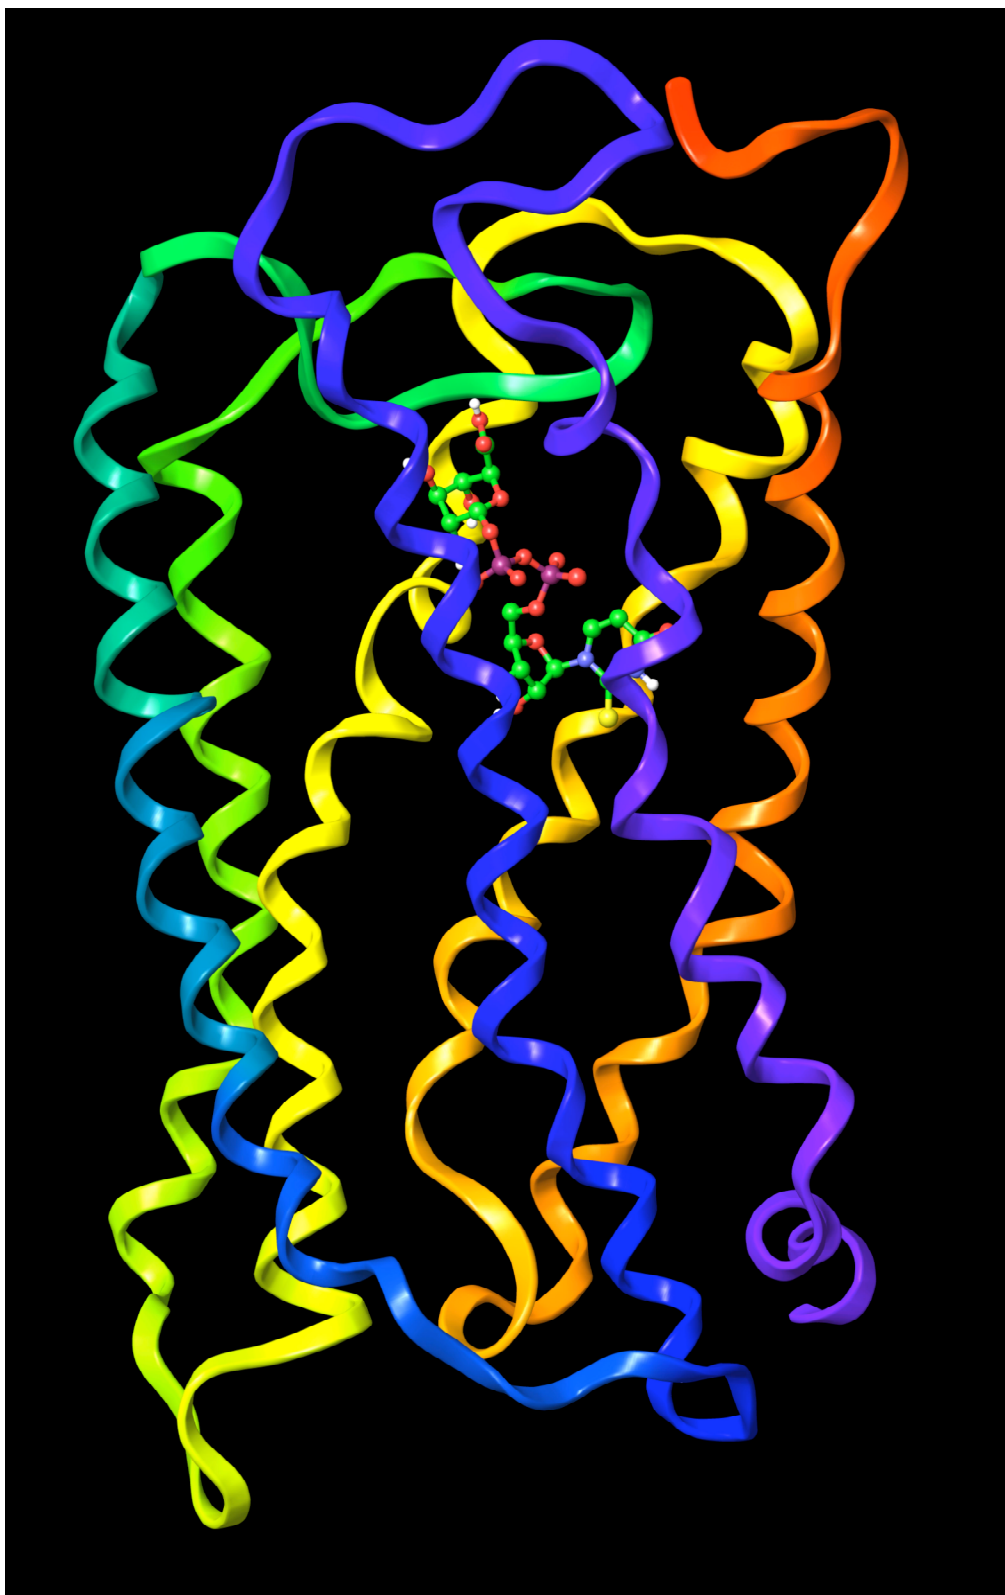

Figure 2.

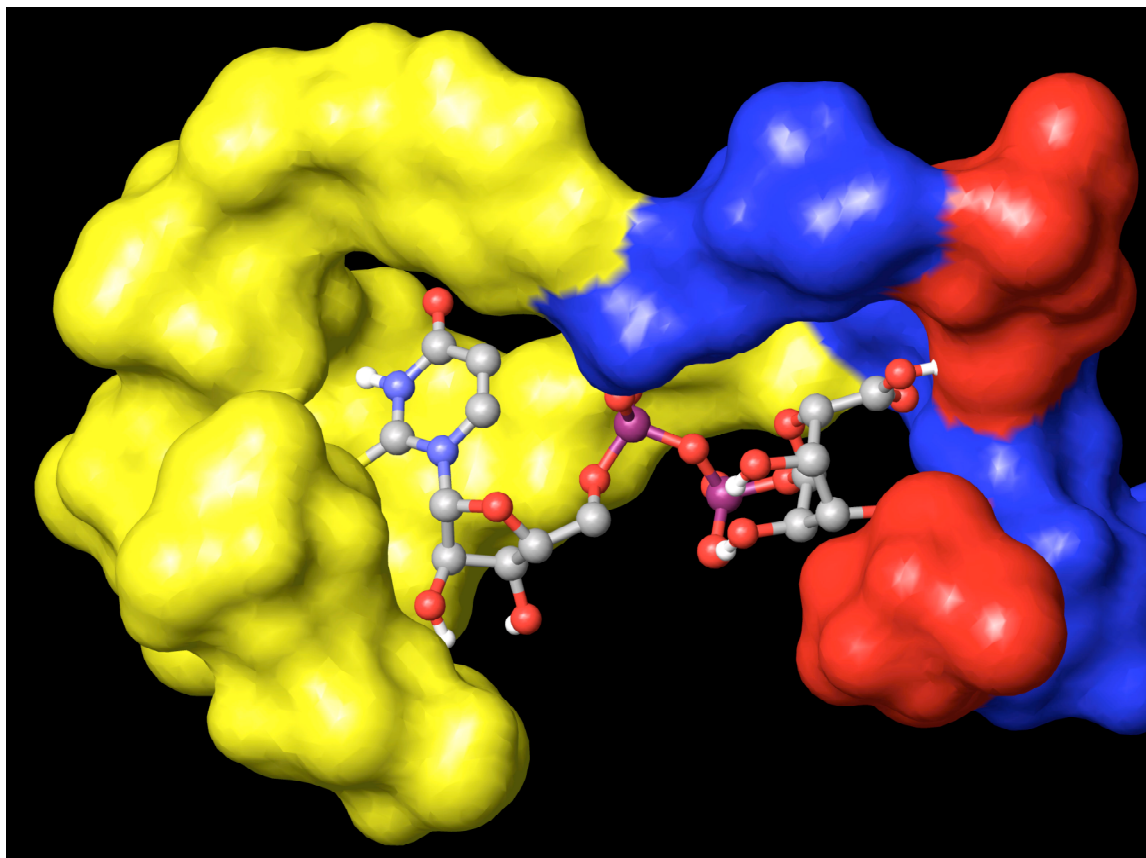

Supplement: NIHMS31363-supplement-supporting_information_file2.pdf [file NIHMS31363-supplement-supporting_information_file2.pdf]
